# Supplementary material for: Gut microbiota and hypertensive disorders in pregnancy: evidence from the Mendelian randomization study
Source: publisher site journal article supplement (doi:10.18632/aging.205019), 2023-09-11
Supplement: Supplementary file [file aging-v15i17-205019-supplementary-material-SD1.pdf]

**SUPPLEMENTARY FIGURES**

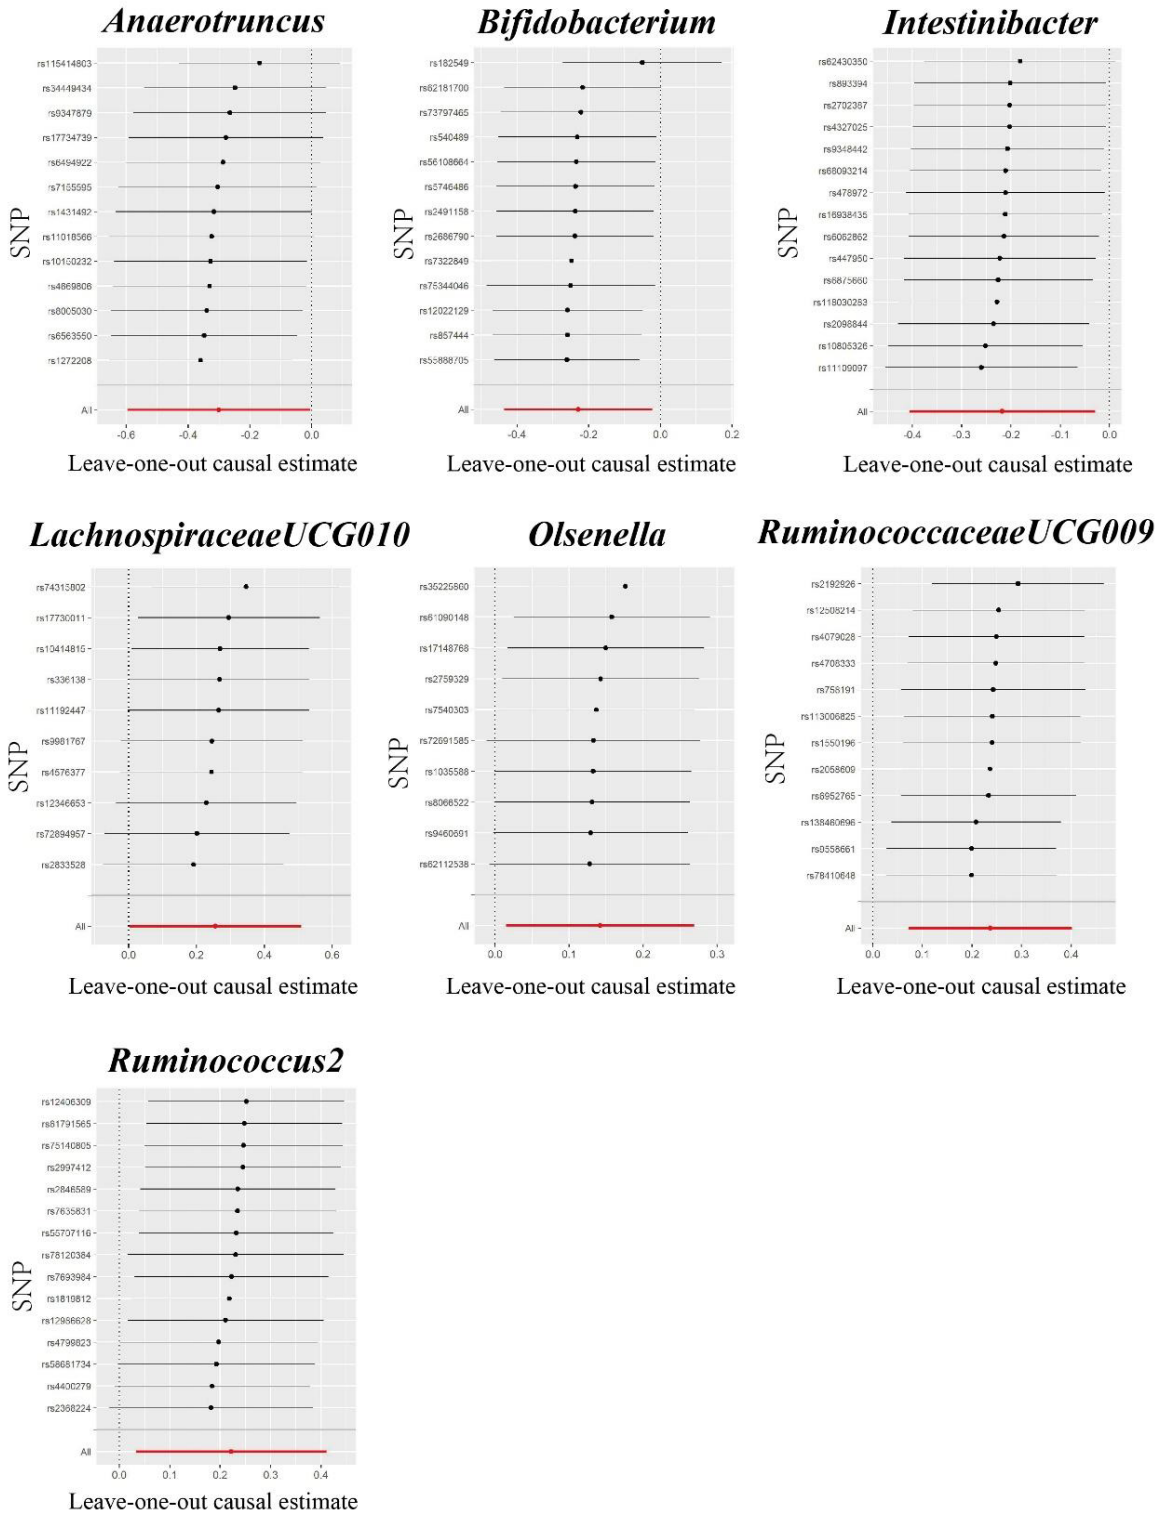

**Supplementary Figure 1. Leave-one-out plots for the causal association between gut microbiota and GH in forward MR analyses.**

***Eubacterium  
(ruminantium group)***

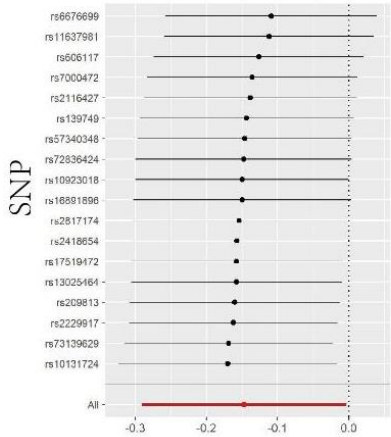

Leave-one-out causal estimate

***Eubacterium  
(ventriosum group)***

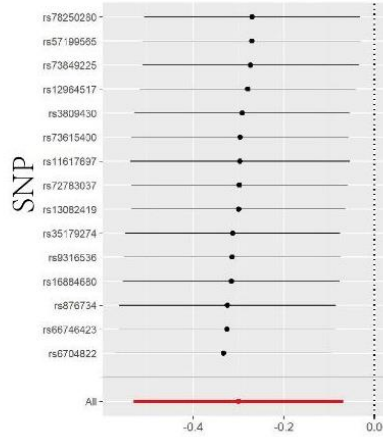

Leave-one-out causal estimate

***Methanobrevibacter***

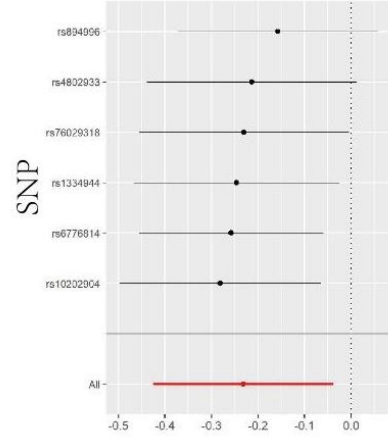

Leave-one-out causal estimate

***RuminococcaceaeUCG002***

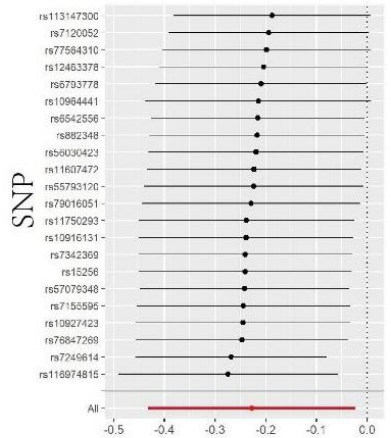

Leave-one-out causal estimate

***Tyzzerella3***

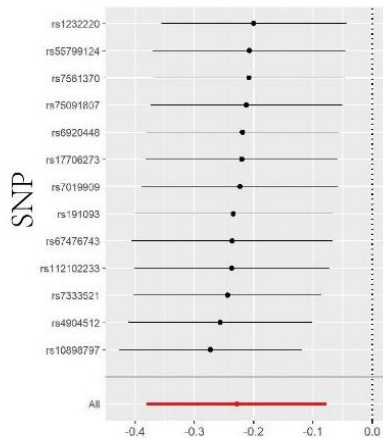

Leave-one-out causal estimate

Supplementary Figure 2. Leave-one-out plots for the causal association between gut microbiota and PE in forward MR analyses.

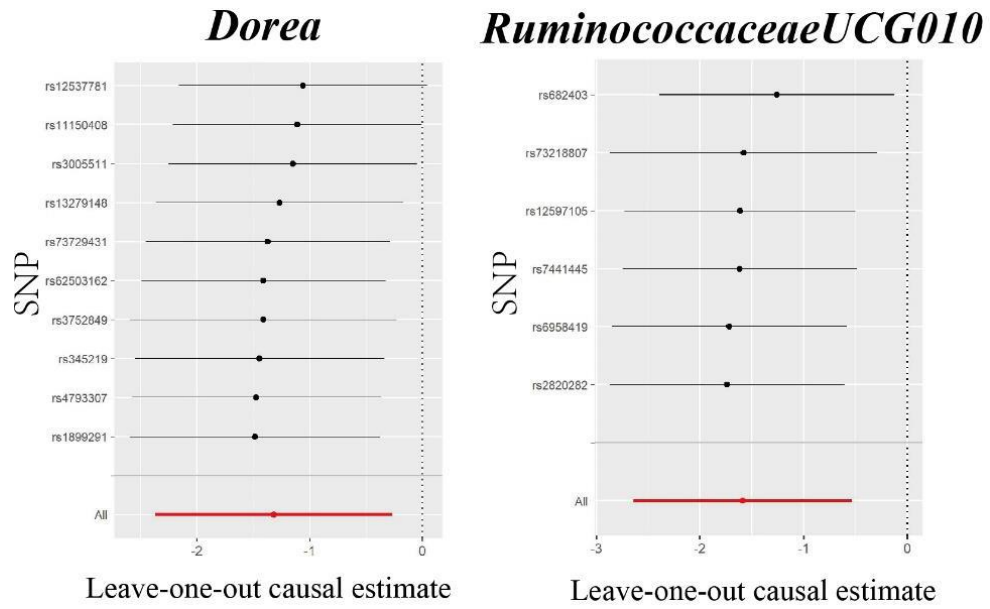

Supplementary Figure 3. Leave-one-out plots for the causal association between gut microbiota and eclampsia in forward MR analyses.

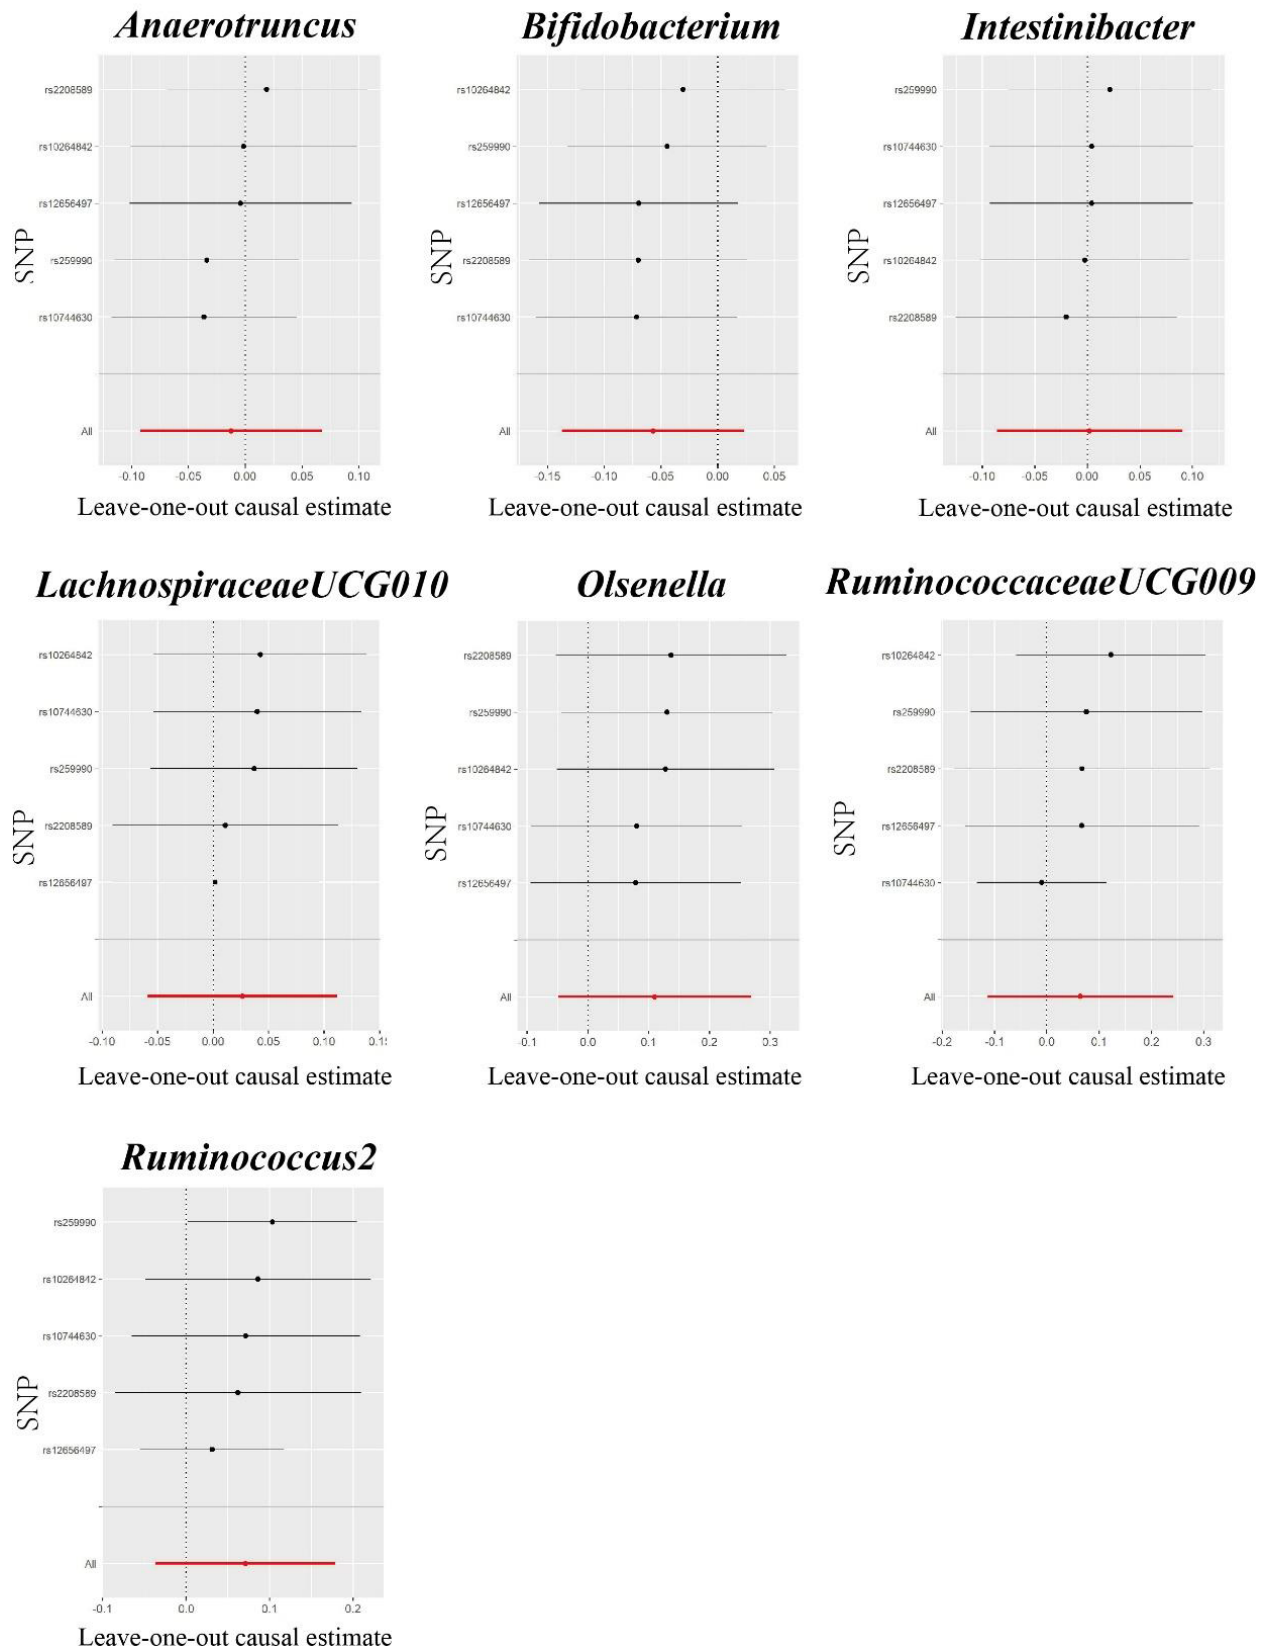

Supplementary Figure 4. Leave-one-out plots for the causal association between gut microbiota and GH in reverse MR analyses.

***Eubacterium  
(ruminantium group)***

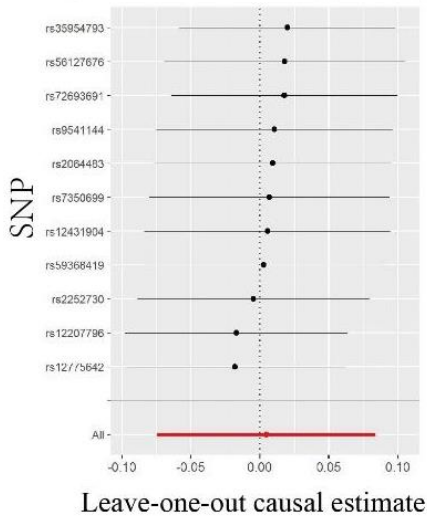

***Eubacterium  
(ventriosum group)***

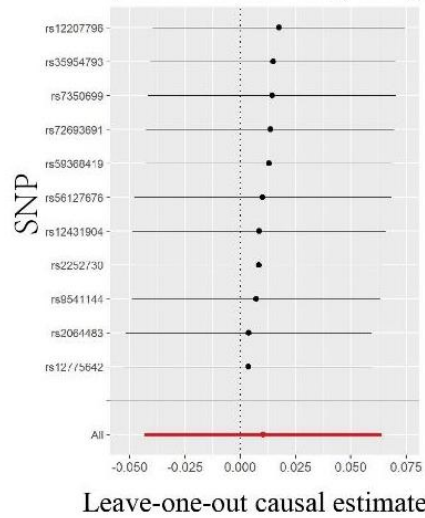

***Methanobrevibacter***

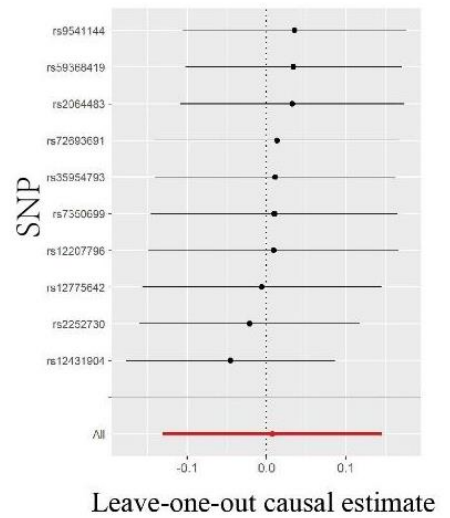

***RuminococcaceaeUCG002***

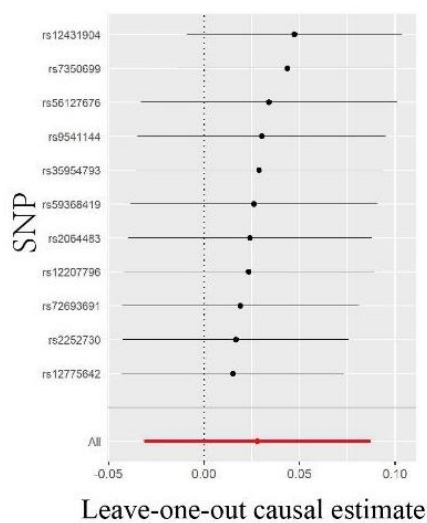

***Tyzzzeria3***

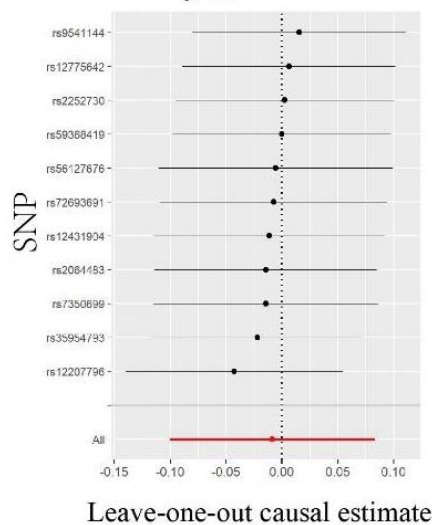

Supplementary Figure 5. Leave-one-out plots for the causal association between gut microbiota and PE in reverse MR analyses.

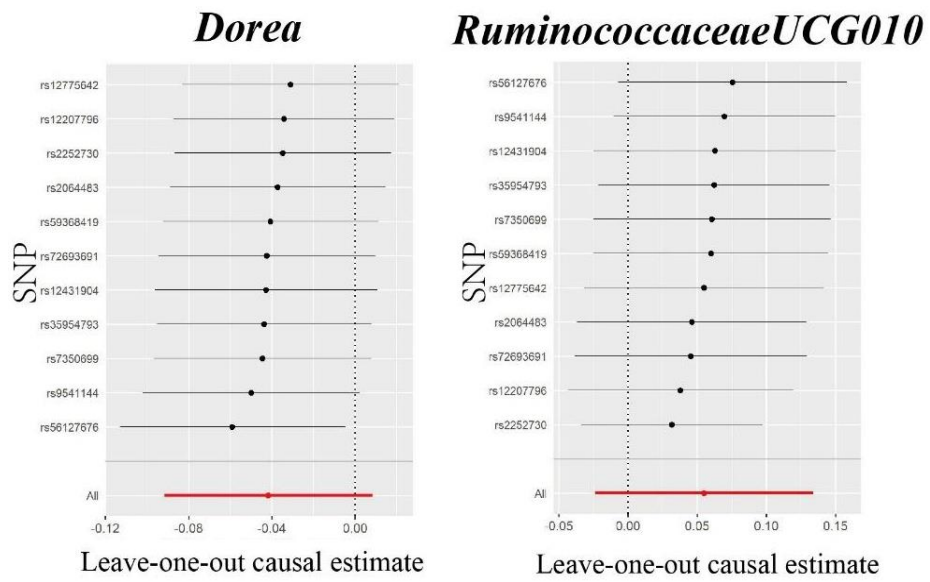

**Supplementary Figure 6. Leave-one-out plots for the causal association between gut microbiota and eclampsia in reverse MR analyses.**
