# Supplementary material for: Gut microbiota and hypertensive disorders in pregnancy: evidence from the Mendelian randomization study
Source: publisher site journal article supplement (doi:10.18632/aging.205019), 2023-09-11
Supplement: Supplementary file [file aging-v15i17-205019-supplementary-material-SD7.pdf]

**Supplementary Table 6. Tests for detecting horizontal and directional pleiotropy in forward MR analysis.**

| Exposure  |                                    | MR-PRESSO global test |         | MR-Egger intercept pEgger |                |         | Cochran's Q test |              |
|-----------|------------------------------------|-----------------------|---------|---------------------------|----------------|---------|------------------|--------------|
|           |                                    | MR-PRESSO             |         | Egger-intercept           | Standard Error | P value | IVW (P)          | MR-Egger (P) |
|           |                                    | RSSobs                | P value |                           |                |         |                  |              |
| GH        | <i>RuminococcaceaeUCG009</i>       | 12.846                | 0.490   | -0.298                    | 0.033          | 0.384   | 0.457            | 0.440        |
| GH        | <i>Ruminococcus2</i>               | 13.843                | 0.624   | -0.016                    | 0.018          | 0.405   | 0.589            | 0.571        |
| GH        | <i>Intestinibacter</i>             | 9.643                 | 0.880   | 0.022                     | 0.025          | 0.396   | 0.865            | 0.864        |
| GH        | <i>Olsenella</i>                   | 7.423                 | 0.773   | 0.013                     | 0.028          | 0.660   | 0.696            | 0.622        |
| GH        | <i>Bifidobacterium</i>             | 20.512                | 0.201   | 0.037                     | 0.021          | 0.102   | 0.307            | 0.467        |
| GH        | <i>Anaerotruncus</i>               | 22.391                | 0.108   | 0.022                     | 0.031          | 0.481   | 0.011            | 0.093        |
| GH        | <i>LachnospiraceaeUCG010</i>       | 9.269                 | 0.572   | 0.009                     | 0.030          | 0.769   | 0.613            | 0.521        |
| PE        | <i>Tyzzerella3</i>                 | 14.042                | 0.493   | 0.013                     | 0.065          | 0.847   | 0.422            | 0.344        |
| PE        | <i>Eubacteriumventriosumgroup</i>  | 6.553                 | 0.978   | 0.007                     | 0.039          | 0.865   | 0.972            | 0.956        |
| PE        | <i>Methanobrevibacter</i>          | 6.128                 | 0.555   | 0.055                     | 0.053          | 0.357   | 0.493            | 0.505        |
| PE        | <i>RuminococcaceaeUCG002</i>       | 28.348                | 0.221   | -0.009                    | 0.021          | 0.650   | 0.206            | 0.174        |
| PE        | <i>Eubacteriumruminantiumgroup</i> | 18.405                | 0.507   | -0.036                    | 0.023          | 0.140   | 0.484            | 0.578        |
| Eclampsia | <i>RuminococcaceaeUCG010</i>       | 3.664                 | 0.801   | 0.001                     | 0.105          | 0.991   | 0.746            | 0.609        |
| Eclampsia | <i>Dorea</i>                       | 8.411                 | 0.679   | -0.098                    | 0.098          | 0.348   | 0.649            | 0.660        |

**Supplementary Table 7. Reverse MR analyses of gut microbiota on HDP subtypes by different methods.**

| Exposure  | Outcome                                | Inverse variance weighted |       | Maximum likelihood        |        | Weighted median          |       | MR.RAPS                   |        | MR Egger                 |       |
|-----------|----------------------------------------|---------------------------|-------|---------------------------|--------|--------------------------|-------|---------------------------|--------|--------------------------|-------|
|           |                                        | $\beta$ (95%CI)           | P     | $\beta$ (95%CI)           | P      | $\beta$ (95%CI)          | P     | $\beta$ (95%CI)           | P      | $\beta$ (95%CI)          | P     |
| GH        | <i>Anaerotruncus</i>                   | 0.006<br>(-0.041,0.053)   | 0.795 | 0.006<br>(-0.037,0.050)   | 0.773  | -0.038<br>(-0.097,0.021) | 0.207 | 0.011<br>(-0.031,0.054)   | 0.61   | -0.099<br>(-0.283,0.085) | 0.31  |
| GH        | <i>Bifidobacterium</i>                 | -0.083<br>(-0.160,-0.007) | 0.033 | -0.926<br>(-0.141,-0.044) | <0.001 | -0.027<br>(-0.089,0.036) | 0.405 | -0.085<br>(-0.130,-0.041) | <0.001 | 0.140<br>(-0.151,0.432)  | 0.359 |
| GH        | <i>Intestinibacter</i>                 | 0.003<br>(-0.046,0.053)   | 0.893 | 0.004<br>(-0.047,0.054)   | 0.891  | -0.012<br>(-0.077,0.052) | 0.731 | -0.002<br>(-0.051,0.048)  | 0.939  | -0.031<br>(-0.226,0.163) | 0.755 |
| GH        | <i>Lachnospiraceae</i>                 | 0.002<br>(-0.047,0.051)   | 0.943 | 0.002<br>(-0.047,0.051)   | 0.941  | -0.015<br>(-0.084,0.055) | 0.674 | -0.003<br>(-0.051,0.045)  | 0.896  | -0.039<br>(-0.236,0.158) | 0.706 |
| GH        | <i>Olsenella</i>                       | -0.013<br>(-0.012,0.090)  | 0.798 | -0.014<br>(-0.106,0.078)  | 0.762  | 0.043<br>(-0.086,0.171)  | 0.514 | -0.006<br>(-0.094,0.083)  | 0.901  | 0.221<br>(-0.182,0.624)  | 0.296 |
| GH        | <i>Ruminococcaceae</i>                 | 0.004<br>(-0.060,0.068)   | 0.901 | 0.004<br>(-0.060,0.069)   | 0.899  | -0.002<br>(-0.090,0.087) | 0.973 | 0.005<br>(-0.059,0.069)   | 0.871  | -0.063<br>(-0.322,0.195) | 0.637 |
| GH        | <i>Ruminococcus2</i>                   | 0.017<br>(-0.038,0.072)   | 0.546 | 0.018<br>(-0.028,0.064)   | 0.435  | -0.026<br>(-0.091,0.039) | 0.43  | 0.012<br>(-0.032,0.055)   | 0.603  | -0.046<br>(-0.267,0.176) | 0.692 |
| PE        | <i>Eubacterium (ruminantium group)</i> | 0.005<br>(-0.074,0.084)   | 0.909 | 0.005<br>(-0.073,0.082)   | 0.903  | -0.018<br>(-0.124,0.088) | 0.783 | 0.003<br>(-0.074,0.081)   | 0.81   | -0.047<br>(-0.305,0.211) | 0.73  |
| PE        | <i>Eubacterium (ventriosum group)</i>  | 0.010<br>(-0.043,0.064)   | 0.703 | 0.011<br>(-0.044,0.065)   | 0.703  | 0.013<br>(-0.054,0.081)  | 0.703 | 0.001<br>(-0.054,0.057)   | 0.969  | -0.040<br>(-0.208,0.129) | 0.657 |
| PE        | <i>Methanobrevibacter</i>              | 0.007<br>(-0.131,0.146)   | 0.918 | 0.008<br>(-0.118,0.133)   | 0.902  | -0.010<br>(-0.185,0.165) | 0.909 | 0.003<br>(-0.120,0.125)   | 0.967  | 0.218<br>(-0.324,0.761)  | 0.453 |
| PE        | <i>Ruminococcaceae UCG002</i>          | 0.028<br>(-0.031,0.087)   | 0.354 | 0.029<br>(-0.024,0.081)   | 0.283  | 0.022<br>(-0.048,0.093)  | 0.54  | 0.003<br>(-0.048,0.055)   | 0.195  | -0.082<br>(-0.262,0.097) | 0.392 |
| PE        | <i>Tyzzarella3</i>                     | -0.008<br>(-0.100,0.083)  | 0.856 | -0.009<br>(-0.102,0.085)  | 0.851  | -0.019<br>(-0.143,0.105) | 0.764 | -0.019<br>(-0.112,0.074)  | 0.692  | 0.121<br>(-0.171,0.412)  | 0.439 |
| Eclampsia | <i>Dorea</i>                           | -0.002<br>(-0.021,-0.017) | 0.821 | -0.002<br>(-0.022,0.017)  | 0.817  | 0.002<br>(-0.024,0.029)  | 0.859 | -0.002<br>(-0.023,0.018)  | 0.825  | 0.006<br>(-0.053,0.065)  | 0.847 |
| Eclampsia | <i>Ruminococcaceae UCG010</i>          | -0.003<br>(-0.025,0.019)  | 0.78  | -0.003<br>(-0.027,0.019)  | 0.78   | 0.003<br>(-0.023,0.030)  | 0.808 | -0.003<br>(-0.027,0.021)  | 0.795  | 0.010<br>(-0.055,0.076)  | 0.767 |

**Supplementary Table 8. Tests for detecting horizontal and directional pleiotropy in reverse MR analysis.**

| Exposure  | Outcome                            | MR-PRESSO global test |         | MR-Egger intercept pEgger |       |         | Cochran's Q test |              |
|-----------|------------------------------------|-----------------------|---------|---------------------------|-------|---------|------------------|--------------|
|           |                                    | MR-PRESSO             |         | Standard                  |       |         | IVW (P)          | MR-Egger (P) |
|           |                                    | RSSobs                | P value | Egger-intercept           | Error | P value |                  |              |
| GH        | <i>RuminococcaceaeUCG009</i>       | 14.827                | 0.075   | 0.059                     | 0.081 | 0.521   | 0.041            | 0.038        |
| GH        | <i>Ruminococcus2</i>               | 10.731                | 0.183   | 0.057                     | 0.042 | 0.265   | 0.114            | 0.204        |
| GH        | <i>Intestinibacter</i>             | 1.994                 | 0.881   | -0.014                    | 0.038 | 0.733   | 0.874            | 0.781        |
| GH        | <i>Olsenella</i>                   | 2.715                 | 0.786   | 0.082                     | 0.068 | 0.314   | 0.771            | 0.945        |
| GH        | <i>Bifidobacterium</i>             | 4.230                 | 0.618   | 0.027                     | 0.034 | 0.483   | 0.601            | 0.550        |
| GH        | <i>Anaerotruncus</i>               | 7.333                 | 0.364   | 0.019                     | 0.037 | 0.636   | 0.329            | 0.238        |
| GH        | <i>LachnospiraceaeUCG010</i>       | 3.951                 | 0.673   | 0.023                     | 0.036 | 0.575   | 0.623            | 0.526        |
| PE        | <i>Tyzzerella3</i>                 | 12.231                | 0.449   | -0.022                    | 0.024 | 0.384   | 0.432            | 0.415        |
| PE        | <i>Eubacteriumventriosumgroup</i>  | 3.393                 | 0.987   | 0.008                     | 0.014 | 0.555   | 0.985            | 0.981        |
| PE        | <i>Methanobrevibacter</i>          | 14.515                | 0.255   | -0.033                    | 0.042 | 0.453   | 0.237            | 0.215        |
| PE        | <i>RuminococcaceaeUCG002</i>       | 16.654                | 0.203   | 0.019                     | 0.015 | 0.236   | 0.192            | 0.240        |
| PE        | <i>Eubacteriumruminantiumgroup</i> | 13.034                | 0.397   | 0.009                     | 0.021 | 0.690   | 0.370            | 0.301        |
| Eclampsia | <i>RuminococcaceaeUCG010</i>       | 22.031                | 0.064   | 0.019                     | 0.020 | 0.368   | 0.053            | 0.057        |
| Eclampsia | <i>Dorea</i>                       | 8.979                 | 0.688   | -0.018                    | 0.013 | 0.185   | 0.709            | 0.824        |

**Supplementary Table 9. Detailed information for genome-wide association studies involved in the present mendelian randomization study.**

| Variable       | Consortium or study | Sample size | Journal    | Year | Cohort        | Nation of cohort | Number of samples            |
|----------------|---------------------|-------------|------------|------|---------------|------------------|------------------------------|
| Gut microbiota | MiBioGen            | 18,340      | Nat Genet. | 2021 | BSPSPC        | Germany          | 721                          |
|                |                     |             |            |      | CARDIAw       | USA              | 257                          |
|                |                     |             |            |      | COPSAC        | Denmark          | 380                          |
|                |                     |             |            |      | DanFunD16     | Denmark          | 2,396                        |
|                |                     |             |            |      | FGFP          | Belgian          | 2,259                        |
|                |                     |             |            |      | FOCUS         | Germany          | 960                          |
|                |                     |             |            |      | GEM_HCE_v12   | Canada           | 378                          |
|                |                     |             |            |      | GEM_HCE_v24   | Canada           | 203                          |
|                |                     |             |            |      | GEM_ICHIP_HCE | Canada           | 662                          |
|                |                     |             |            |      | GenR          | The Netherlands  | 1,328                        |
|                |                     |             |            |      | HCHS/SOL      | USA              | 1,097                        |
|                |                     |             |            |      | KSCS          | South Korea      | 811                          |
|                |                     |             |            |      | LLD           | The Netherlands  | 875                          |
|                |                     |             |            |      | METSIM        | Finland          | 522                          |
|                |                     |             |            |      | MIBS          | The Netherlands  | 80                           |
|                |                     |             |            |      | NGRC          | USA              | 77                           |
|                |                     |             |            |      | NTR           | The Netherlands  | 279                          |
|                |                     |             |            |      | PNP           | Israel           | 481                          |
|                |                     |             |            |      | POPCOL        | Sweden           | 134                          |
|                |                     |             |            |      | RS3           | The Netherlands  | 1,220                        |
| SHIP           | Germany             | 996         |            |      |               |                  |                              |
| SHIP-TREND     | Germany             | 905         |            |      |               |                  |                              |
|                | TwinsUK             | UK          | 1,205      |      |               |                  |                              |
| HDP            | FinnGen             | 1,22,421    |            | 2021 | FinnGen       | European         | 7,686 cases/114,735 controls |
| GH             | FinnGen             | 1,18,990    |            | 2021 | FinnGen       | European         | 4,255 cases/114,735 controls |
| PE             | FinnGen             | 1,18,291    |            | 2021 | FinnGen       | European         | 3,556 cases/114,735 controls |
| Eclampsia      | FinnGen             | 1,15,025    |            | 2021 | FinnGen       | European         | 290 cases/114,735 controls   |
