# Supplementary material for: Gut microbiota and hypertensive disorders in pregnancy: evidence from the Mendelian randomization study
Source: Aging (Albany NY). 2023 Sep 11;15(17):9105–27. doi: 10.18632/aging.205019 (PMC10522390; doi:10.18632/aging.205019)
Supplement: Supplementary Table 2 [file aging-15-205019-s003.xlsx]

## Sheet: Table S2
Supplementary Table 2. Odds ratio for association of genetically predicted gut microbiota with HDP using the method of Inverse variance weighted (IVW).
Outcome	Exposure	Numbers of SNP	P value	OR(95%CI)
HDP	genus.RuminococcaceaeUCG002.id.11360	22	0.0109869	0.843(0.738,0.961)
HDP	genus.Intestinibacter.id.11345	15	0.0114301	0.833(0.719,0.959)
HDP	genus.Eubacteriumventriosumgroup.id.11341	15	0.0118605	0.813(0.688,0.954)
HDP	genus.RuminococcaceaeUCG009.id.11366	12	0.0154221	1.173(1.031,1.343)
HDP	genus.Bifidobacterium.id.436	13	0.0215334	0.813(0.683,0.970)
HDP	genus.Senegalimassilia.id.11160	5	0.0333277	0.793(0.646,0.982)
HDP	genus.Tyzzerella3.id.11335	13	0.0394646	0.873(0.768,0.993)
HDP	genus.Parabacteroides.id.954	5	0.0474335	0.753(0.566,0.996)
HDP	genus.Anaerotruncus.id.2054	13	0.0533935	0.833(0.695,1.002)
HDP	genus.Eubacteriumrectalegroup.id.14374	8	0.0653968	0.803(0.636,1.014)
HDP	genus.Sellimonas.id.14369	9	0.0796013	0.913(0.837,1.009)
HDP	genus.Olsenella.id.822	10	0.0833242	1.103(0.987,1.231)
HDP	genus.Desulfovibrio.id.3173	10	0.0858059	1.153(0.980,1.350)
HDP	genus.Sutterella.id.2896	12	0.0921298	1.163(0.975,1.389)
HDP	genus.Butyrivibrio.id.1993	15	0.0923805	0.933(0.866,1.010)
HDP	genus.Roseburia.id.2012	14	0.0931119	1.173(0.973,1.407)
HDP	genus.Haemophilus.id.3698	9	0.132553	0.883(0.748,1.038)
HDP	genus.Anaerofilum.id.2053	11	0.132947	0.913(0.817,1.026)
HDP	genus.Akkermansia.id.4037	11	0.142613	1.133(0.959,1.332)
HDP	genus.LachnospiraceaeND3007group.id.11317	3	0.145872	1.333(0.904,1.964)
HDP	genus.RuminococcaceaeUCG003.id.11361	12	0.147627	0.873(0.720,1.050)
HDP	genus.Ruminococcus1.id.11373	10	0.162842	0.803(0.598,1.090)
HDP	genus.Butyricimonas.id.945	13	0.16491	1.123(0.953,1.318)
HDP	genus.LachnospiraceaeUCG010.id.11330	10	0.165925	1.153(0.941,1.421)
HDP	genus.Gordonibacter.id.821	12	0.170384	1.063(0.972,1.171)
HDP	genus.Eubacteriumeligensgroup.id.14372	6	0.171521	0.803(0.597,1.096)
HDP	genus.Enterorhabdus.id.820	6	0.182303	0.883(0.729,1.061)
HDP	genus.lntestinibacter.id.11345	3	0.187277	0.813(0.604,1.103)
HDP	genus.RuminococcaceaeUCG004.id.11362	11	0.188639	0.893(0.764,1.054)
HDP	genus.Lachnospira.id.2004	6	0.204881	0.833(0.623,1.106)
HDP	genus.Bacteroides.id.918	9	0.211281	0.863(0.697,1.083)
HDP	genus.Streptococcus.id.1853	14	0.222021	1.113(0.935,1.333)
HDP	genus.Eubacteriumcoprostanoligenesgroup.id.11375	13	0.233559	1.123(0.926,1.369)
HDP	genus.LachnospiraceaeUCG001.id.11321	13	0.235815	1.083(0.947,1.244)
HDP	genus.Oscillibacter.id.2063	13	0.239491	0.923(0.809,1.054)
HDP	genus.Methanobrevibacter.id.123	6	0.240715	0.873(0.709,1.089)
HDP	genus.Odoribacter.id.952	7	0.304561	1.123(0.896,1.417)
HDP	genus.Turicibacter.id.2162	10	0.305103	1.083(0.924,1.285)
HDP	genus.RuminococcaceaeUCG011.id.11368	8	0.307061	0.933(0.829,1.060)
HDP	genus.RuminococcaceaeUCG010.id.11367	6	0.320627	0.893(0.718,1.114)
HDP	genus.Collinsella.id.815	9	0.329938	0.893(0.716,1.118)
HDP	genus.Ruminococcus2.id.11374	15	0.341563	1.083(0.919,1.274)
HDP	genus.Veillonella.id.2198	6	0.350051	0.903(0.737,1.114)
HDP	genus.Parasutterella.id.2892	14	0.35283	0.923(0.775,1.095)
HDP	genus.DefluviitaleaceaeUCG011.id.11287	9	0.373342	1.073(0.914,1.268)
HDP	genus.Eubacteriumruminantiumgroup.id.11340	18	0.38796	0.953(0.850,1.065)
HDP	genus.Victivallis.id.2256	10	0.404594	1.043(0.945,1.150)
HDP	genus.Subdoligranulum.id.2070	11	0.40707	1.083(0.893,1.318)
HDP	genus.RikenellaceaeRC9gutgroup.id.11191	11	0.41264	1.033(0.947,1.139)
HDP	genus.Lachnoclostridium.id.11308	13	0.414886	1.083(0.897,1.301)
HDP	genus.RuminococcaceaeUCG014.id.11371	11	0.433258	1.083(0.886,1.325)
HDP	genus.Allisonella.id.2174	8	0.439653	1.043(0.940,1.151)
HDP	genus.LachnospiraceaeNK4A136group.id.11319	15	0.442365	0.943(0.814,1.093)
HDP	genus.LachnospiraceaeNC2004group.id.11316	9	0.447801	0.943(0.814,1.094)
HDP	genus.Prevotella9.id.11183	15	0.454832	1.053(0.917,1.210)
HDP	genus.RuminococcaceaeUCG005.id.11363	14	0.458301	1.073(0.889,1.295)
HDP	genus.Eubacteriumoxidoreducensgroup.id.11339	5	0.460018	1.063(0.899,1.263)
HDP	genus.Adlercreutzia.id.812	8	0.468574	0.933(0.791,1.113)
HDP	genus.Ruminococcustorquesgroup.id.14377	9	0.470136	1.103(0.843,1.446)
HDP	genus.Intestinimonas.id.2062	14	0.479088	1.053(0.910,1.221)
HDP	genus.Barnesiella.id.944	13	0.485123	0.923(0.753,1.143)
HDP	genus.Terrisporobacter.id.11348	5	0.513643	0.933(0.767,1.141)
HDP	genus.Paraprevotella.id.962	13	0.513712	1.043(0.924,1.170)
HDP	genus.Escherichia.Shigella.id.3504	10	0.515584	1.063(0.873,1.308)
HDP	genus.LachnospiraceaeFCS020group.id.11314	12	0.52163	1.073(0.866,1.326)
HDP	genus.Hungatella.id.11306	5	0.530421	0.933(0.774,1.140)
HDP	genus.Fusicatenibacter.id.11305	18	0.551369	0.953(0.809,1.119)
HDP	genus.Ruminococcusgnavusgroup.id.14376	12	0.582289	0.963(0.859,1.088)
HDP	genus.Lactococcus.id.1851	9	0.586849	0.963(0.853,1.093)
HDP	genus.Anaerostipes.id.1991	13	0.59315	1.073(0.822,1.408)
HDP	genus.Coprobacter.id.949	10	0.601258	0.943(0.779,1.155)
HDP	genus.Alloprevotella.id.961	6	0.604666	0.953(0.789,1.147)
HDP	genus.Faecalibacterium.id.2057	10	0.607511	1.053(0.853,1.311)
HDP	genus.Blautia.id.1992	13	0.61052	0.953(0.781,1.155)
HDP	genus.Howardella.id.2000	9	0.619245	1.023(0.928,1.132)
HDP	genus.Peptococcus.id.2037	12	0.631791	1.023(0.922,1.142)
HDP	genus.Holdemanella.id.11393	11	0.633815	1.033(0.911,1.165)
HDP	genus.Marvinbryantia.id.2005	10	0.638219	0.953(0.793,1.151)
HDP	genus.Romboutsia.id.11347	13	0.665741	0.963(0.805,1.147)
HDP	genus.Flavonifractor.id.2059	5	0.670782	0.953(0.751,1.201)
HDP	genus.ChristensenellaceaeR.7group.id.11283	10	0.693399	1.043(0.842,1.294)
HDP	genus.Oxalobacter.id.2978	11	0.704758	1.023(0.901,1.164)
HDP	genus.Eubacteriumfissicatenagroup.id.14373	9	0.71426	0.973(0.874,1.096)
HDP	genus.ErysipelotrichaceaeUCG003.id.11384	16	0.720425	0.973(0.839,1.128)
HDP	genus.Ruminiclostridium9.id.11357	8	0.720778	0.943(0.696,1.284)
HDP	genus.Clostridiuminnocuumgroup.id.14397	9	0.73233	1.013(0.915,1.134)
HDP	genus.Eubacteriumhalliigroup.id.11338	16	0.771678	1.023(0.877,1.191)
HDP	genus.Eubacteriumnodatumgroup.id.11297	11	0.775483	0.983(0.899,1.082)
HDP	genus.Eisenbergiella.id.11304	11	0.778408	1.013(0.904,1.143)
HDP	genus.LachnospiraceaeUCG004.id.11324	12	0.783107	1.023(0.852,1.235)
HDP	genus.Coprococcus1.id.11301	12	0.783543	0.973(0.781,1.204)
HDP	genus.Erysipelatoclostridium.id.11381	15	0.79777	1.013(0.893,1.158)
HDP	genus.LachnospiraceaeUCG008.id.11328	11	0.809081	0.973(0.810,1.177)
HDP	genus.Phascolarctobacterium.id.2168	9	0.809922	1.023(0.845,1.240)
HDP	genus.Eubacteriumxylanophilumgroup.id.14375	9	0.824689	0.973(0.799,1.195)
HDP	genus.Eggerthella.id.819	10	0.829938	0.983(0.843,1.146)
HDP	genus.Oscillospira.id.2064	8	0.833076	1.013(0.851,1.220)
HDP	genus.Catenibacterium.id.2153	4	0.836844	1.023(0.827,1.263)
HDP	genus.Prevotella7.id.11182	11	0.83873	0.993(0.899,1.089)
HDP	genus.Slackia.id.825	6	0.852587	1.023(0.798,1.313)
HDP	genus.RuminococcaceaeNK4A214group.id.11358	13	0.85396	1.013(0.843,1.228)
HDP	genus.Bilophila.id.3170	13	0.863142	0.983(0.818,1.182)
HDP	genus.lntestinimonas.id.2062	3	0.863886	0.973(0.711,1.330)
HDP	genus.Alistipes.id.968	13	0.869986	1.023(0.779,1.342)
HDP	genus.Coprococcus3.id.11303	9	0.873541	0.983(0.782,1.231)
HDP	genus.Coprococcus2.id.11302	8	0.885734	0.983(0.802,1.209)
HDP	genus.Actinomyces.id.423	7	0.888798	1.013(0.847,1.210)
HDP	genus.Dorea.id.1997	10	0.9006	0.983(0.786,1.234)
HDP	genus.Eubacteriumbrachygroup.id.11296	10	0.913044	0.993(0.877,1.123)
HDP	genus.RuminococcaceaeUCG013.id.11370	12	0.935781	1.003(0.839,1.209)
HDP	genus.CandidatusSoleaferrea.id.11350	10	0.939912	1.003(0.869,1.163)
HDP	genus.Holdemania.id.2157	14	0.940912	0.993(0.828,1.190)
HDP	genus.Dialister.id.2183	11	0.947475	0.993(0.831,1.188)
HDP	genus.Clostridiumsensustricto1.id.1873	7	0.953664	1.003(0.826,1.224)
HDP	genus.Ruminiclostridium5.id.11355	11	0.981817	1.003(0.812,1.236)
HDP	genus.Ruminiclostridium6.id.11356	15	0.983679	0.993(0.842,1.182)
HDP	genus.Ruminococcusgauvreauiigroup.id.11342	12	0.984789	0.993(0.843,1.181)
HDP	genus.Lactobacillus.id.1837	9	0.986663	1.003(0.880,1.138)
HDP	genus.Butyricicoccus.id.2055	8	0.993899	1.003(0.811,1.233)
