# Supplementary material for: Gut microbiota and hypertensive disorders in pregnancy: evidence from the Mendelian randomization study
Source: Aging (Albany NY). 2023 Sep 11;15(17):9105–27. doi: 10.18632/aging.205019 (PMC10522390; doi:10.18632/aging.205019)
Supplement: Supplementary Table 3 [file aging-15-205019-s004.xlsx]

## Sheet: Table S3
Supplementary Table 3. Odds ratio for association of genetically predicted gut microbiota with GH using the method of Inverse variance weighted (IVW).
Outcome	Exposure	Numbers of SNP	P value	OR(95%CI)
GH	genus.RuminococcaceaeUCG009.id.11366	12	0.00486479	1.267(1.075,1.494)
GH	genus.Ruminococcus2.id.11374	15	0.0215118	1.249(1.033,1.509)
GH	genus.Intestinibacter.id.11345	15	0.0234024	0.804(0.666,0.971)
GH	genus.Olsenella.id.822	10	0.0284438	1.152(1.015,1.308)
GH	genus.Bifidobacterium.id.436	13	0.0298873	0.795(0.647,0.978)
GH	genus.Anaerotruncus.id.2054	13	0.0472179	0.741(0.551,0.996)
GH	genus.LachnospiraceaeUCG010.id.11330	10	0.0487648	1.291(1.001,1.664)
GH	genus.Desulfovibrio.id.3173	10	0.0583983	1.231(0.993,1.526)
GH	genus.Haemophilus.id.3698	9	0.0586311	0.807(0.646,1.008)
GH	genus.Akkermansia.id.4037	11	0.0612859	1.228(0.990,1.523)
GH	genus.Eubacteriumrectalegroup.id.14374	8	0.0775439	0.759(0.559,1.031)
GH	genus.Sellimonas.id.14369	9	0.0849169	0.898(0.794,1.015)
GH	genus.Anaerofilum.id.2053	11	0.0904323	0.879(0.757,1.021)
GH	genus.Intestinimonas.id.2062	14	0.0916048	1.181(0.973,1.432)
GH	genus.RikenellaceaeRC9gutgroup.id.11191	11	0.09321	1.109(0.983,1.252)
GH	genus.Eubacteriumnodatumgroup.id.11297	11	0.100735	1.107(0.980,1.250)
GH	genus.Lachnospira.id.2004	6	0.104055	0.726(0.494,1.068)
GH	genus.Eubacteriumventriosumgroup.id.11341	15	0.117644	0.822(0.643,1.051)
GH	genus.Roseburia.id.2012	14	0.123488	1.209(0.950,1.538)
GH	genus.RuminococcaceaeUCG011.id.11368	8	0.135334	0.889(0.761,1.038)
GH	genus.Oscillibacter.id.2063	13	0.137213	0.877(0.738,1.043)
GH	genus.RuminococcaceaeUCG014.id.11371	11	0.138685	1.262(0.927,1.717)
GH	genus.Butyrivibrio.id.1993	15	0.161544	0.931(0.842,1.029)
GH	genus.Tyzzerella3.id.11335	13	0.170982	0.894(0.761,1.050)
GH	genus.RuminococcaceaeUCG002.id.11360	22	0.178415	0.883(0.737,1.058)
GH	genus.Lachnoclostridium.id.11308	13	0.214211	1.167(0.915,1.489)
GH	genus.Blautia.id.1992	13	0.223901	0.823(0.601,1.127)
GH	genus.Eubacteriumxylanophilumgroup.id.14375	9	0.24875	0.846(0.637,1.124)
GH	genus.RuminococcaceaeUCG010.id.11367	6	0.253933	0.807(0.559,1.166)
GH	genus.Ruminococcusgnavusgroup.id.14376	12	0.270761	0.894(0.732,1.091)
GH	genus.RuminococcaceaeUCG003.id.11361	12	0.282878	0.880(0.697,1.111)
GH	genus.lntestinibacter.id.11345	3	0.283341	0.806(0.543,1.196)
GH	genus.Parabacteroides.id.954	5	0.293562	0.820(0.567,1.187)
GH	genus.Butyricimonas.id.945	13	0.29873	1.160(0.877,1.536)
GH	genus.Enterorhabdus.id.820	6	0.299894	0.839(0.602,1.169)
GH	genus.Eubacteriumeligensgroup.id.14372	6	0.301582	0.838(0.599,1.172)
GH	genus.Streptococcus.id.1853	14	0.307298	1.128(0.895,1.423)
GH	genus.Allisonella.id.2174	8	0.314185	1.070(0.938,1.222)
GH	genus.Ruminococcus1.id.11373	10	0.322116	0.832(0.578,1.198)
GH	genus.LachnospiraceaeND3007group.id.11317	3	0.338588	1.281(0.771,2.129)
GH	genus.Sutterella.id.2896	12	0.340983	1.114(0.892,1.392)
GH	genus.Senegalimassilia.id.11160	5	0.341972	0.875(0.665,1.152)
GH	genus.Eubacteriumoxidoreducensgroup.id.11339	5	0.354229	1.111(0.889,1.388)
GH	genus.Lactococcus.id.1851	9	0.357163	0.929(0.795,1.086)
GH	genus.Bacteroides.id.918	9	0.357243	0.873(0.655,1.165)
GH	genus.Flavonifractor.id.2059	5	0.388335	0.873(0.642,1.188)
GH	genus.Coprococcus1.id.11301	12	0.41648	0.909(0.721,1.145)
GH	genus.Eggerthella.id.819	10	0.416583	0.920(0.751,1.126)
GH	genus.Butyricicoccus.id.2055	8	0.423439	0.894(0.680,1.176)
GH	genus.LachnospiraceaeFCS020group.id.11314	12	0.428439	1.103(0.866,1.404)
GH	genus.Ruminococcustorquesgroup.id.14377	9	0.44128	1.133(0.825,1.556)
GH	genus.Coprococcus3.id.11303	9	0.454346	0.879(0.628,1.232)
GH	genus.RuminococcaceaeNK4A214group.id.11358	13	0.460079	1.091(0.866,1.376)
GH	genus.Ruminiclostridium5.id.11355	11	0.510679	0.909(0.683,1.209)
GH	genus.Dialister.id.2183	11	0.518417	1.081(0.853,1.370)
GH	genus.Erysipelatoclostridium.id.11381	15	0.520346	0.946(0.798,1.121)
GH	genus.ErysipelotrichaceaeUCG003.id.11384	16	0.52117	0.933(0.756,1.152)
GH	genus.Turicibacter.id.2162	10	0.523344	1.071(0.868,1.321)
GH	genus.Coprobacter.id.949	10	0.525537	0.940(0.777,1.137)
GH	genus.Veillonella.id.2198	6	0.53092	1.090(0.832,1.428)
GH	genus.Eisenbergiella.id.11304	11	0.532714	1.050(0.901,1.224)
GH	genus.Dorea.id.1997	10	0.535278	1.104(0.807,1.512)
GH	genus.Bilophila.id.3170	13	0.535863	0.910(0.677,1.225)
GH	genus.RuminococcaceaeUCG013.id.11370	12	0.537114	0.927(0.730,1.178)
GH	genus.CandidatusSoleaferrea.id.11350	10	0.547218	1.053(0.890,1.247)
GH	genus.Catenibacterium.id.2153	4	0.558085	1.073(0.847,1.360)
GH	genus.LachnospiraceaeUCG004.id.11324	12	0.558998	1.075(0.843,1.372)
GH	genus.Ruminiclostridium6.id.11356	15	0.581726	0.941(0.757,1.169)
GH	genus.Eubacteriumcoprostanoligenesgroup.id.11375	13	0.590057	1.087(0.803,1.471)
GH	genus.Oscillospira.id.2064	8	0.601546	1.065(0.841,1.348)
GH	genus.Faecalibacterium.id.2057	10	0.603722	1.089(0.789,1.503)
GH	genus.Parasutterella.id.2892	14	0.605556	0.952(0.788,1.149)
GH	genus.Romboutsia.id.11347	13	0.613285	0.937(0.728,1.206)
GH	genus.DefluviitaleaceaeUCG011.id.11287	9	0.622764	1.055(0.852,1.308)
GH	genus.Prevotella7.id.11182	11	0.628811	1.032(0.908,1.173)
GH	genus.Hungatella.id.11306	5	0.63499	1.065(0.821,1.380)
GH	genus.Eubacteriumfissicatenagroup.id.14373	9	0.637967	0.962(0.819,1.130)
GH	genus.Phascolarctobacterium.id.2168	9	0.641803	0.924(0.663,1.289)
GH	genus.Subdoligranulum.id.2070	11	0.642184	1.070(0.804,1.424)
GH	genus.Alloprevotella.id.961	6	0.643241	0.948(0.756,1.189)
GH	genus.LachnospiraceaeNK4A136group.id.11319	15	0.65235	0.957(0.789,1.160)
GH	genus.Anaerostipes.id.1991	13	0.653438	1.059(0.824,1.362)
GH	genus.Howardella.id.2000	9	0.655137	1.030(0.905,1.173)
GH	genus.Gordonibacter.id.821	12	0.660217	1.028(0.910,1.161)
GH	genus.Holdemania.id.2157	14	0.668655	1.054(0.830,1.338)
GH	genus.Methanobrevibacter.id.123	6	0.674545	0.947(0.734,1.222)
GH	genus.Clostridiuminnocuumgroup.id.14397	9	0.679357	0.966(0.820,1.138)
GH	genus.LachnospiraceaeUCG008.id.11328	11	0.681008	1.052(0.825,1.342)
GH	genus.Escherichia.Shigella.id.3504	10	0.683092	1.055(0.814,1.368)
GH	genus.Fusicatenibacter.id.11305	18	0.684873	0.954(0.762,1.195)
GH	genus.RuminococcaceaeUCG004.id.11362	11	0.697496	0.953(0.745,1.217)
GH	genus.Terrisporobacter.id.11348	5	0.700075	0.950(0.733,1.232)
GH	genus.Ruminiclostridium9.id.11357	8	0.701548	0.940(0.686,1.289)
GH	genus.RuminococcaceaeUCG005.id.11363	14	0.70232	1.056(0.797,1.400)
GH	genus.LachnospiraceaeUCG001.id.11321	13	0.718799	1.033(0.864,1.236)
GH	genus.Actinomyces.id.423	7	0.778872	1.030(0.837,1.268)
GH	genus.Eubacteriumruminantiumgroup.id.11340	18	0.780474	0.981(0.858,1.122)
GH	genus.Lactobacillus.id.1837	9	0.783433	0.971(0.788,1.197)
GH	genus.Collinsella.id.815	9	0.78361	0.960(0.717,1.285)
GH	genus.Oxalobacter.id.2978	11	0.783836	0.975(0.813,1.169)
GH	genus.Alistipes.id.968	13	0.798428	1.044(0.749,1.456)
GH	genus.Coprococcus2.id.11302	8	0.811701	0.969(0.745,1.260)
GH	genus.LachnospiraceaeNC2004group.id.11316	9	0.820532	0.973(0.769,1.232)
GH	genus.Barnesiella.id.944	13	0.827884	1.032(0.777,1.371)
GH	genus.Odoribacter.id.952	7	0.830381	1.033(0.766,1.394)
GH	genus.Peptococcus.id.2037	12	0.836497	1.015(0.882,1.168)
GH	genus.Victivallis.id.2256	10	0.838033	0.983(0.832,1.160)
GH	genus.Holdemanella.id.11393	11	0.858824	1.015(0.864,1.192)
GH	genus.lntestinimonas.id.2062	3	0.884052	1.031(0.684,1.553)
GH	genus.Clostridiumsensustricto1.id.1873	7	0.905284	0.982(0.727,1.326)
GH	genus.Eubacteriumhalliigroup.id.11338	16	0.912876	0.988(0.799,1.222)
GH	genus.Marvinbryantia.id.2005	10	0.918386	0.987(0.774,1.260)
GH	genus.Prevotella9.id.11183	15	0.922211	0.990(0.814,1.205)
GH	genus.Ruminococcusgauvreauiigroup.id.11342	12	0.923045	1.011(0.811,1.260)
GH	genus.Eubacteriumbrachygroup.id.11296	10	0.955542	1.004(0.858,1.176)
GH	genus.Paraprevotella.id.962	13	0.974272	0.998(0.859,1.159)
GH	genus.Slackia.id.825	6	0.97718	0.995(0.714,1.387)
GH	genus.Adlercreutzia.id.812	8	0.979557	1.003(0.775,1.299)
GH	genus.ChristensenellaceaeR.7group.id.11283	10	0.990124	1.002(0.756,1.328)
