# Supplementary material for: Gut microbiota and hypertensive disorders in pregnancy: evidence from the Mendelian randomization study
Source: Aging (Albany NY). 2023 Sep 11;15(17):9105–27. doi: 10.18632/aging.205019 (PMC10522390; doi:10.18632/aging.205019)
Supplement: Supplementary Table 4 [file aging-15-205019-s005.xlsx]

## Sheet: Table S4
Supplementary Table 4. Odds ratio for association of genetically predicted gut microbiota with PE using the method of Inverse variance weighted (IVW).
Outcome	Exposure	Numbers of SNP	P value	OR(95%CI)
PE	genus.Tyzzerella3.id.11335	13	0.00320795	0.796(0.683,0.926)
PE	genus.Eubacteriumventriosumgroup.id.11341	15	0.0106958	0.741(0.588,0.933)
PE	genus.Methanobrevibacter.id.123	6	0.0191403	0.793(0.653,0.963)
PE	genus.RuminococcaceaeUCG002.id.11360	22	0.0289656	0.796(0.649,0.977)
PE	genus.Eubacteriumruminantiumgroup.id.11340	18	0.0451863	0.863(0.748,0.997)
PE	genus.Ruminococcus1.id.11373	10	0.0575911	0.747(0.553,1.009)
PE	genus.Eubacteriumrectalegroup.id.14374	8	0.0624139	0.714(0.501,1.018)
PE	genus.Intestinibacter.id.11345	15	0.0852672	0.837(0.683,1.025)
PE	genus.LachnospiraceaeNK4A136group.id.11319	15	0.0929385	0.785(0.592,1.041)
PE	genus.Enterorhabdus.id.820	6	0.0964321	0.800(0.615,1.041)
PE	genus.Butyrivibrio.id.1993	15	0.10795	0.907(0.806,1.022)
PE	genus.Victivallis.id.2256	10	0.121321	1.125(0.969,1.306)
PE	genus.Senegalimassilia.id.11160	5	0.126184	0.794(0.592,1.067)
PE	genus.Eubacteriumnodatumgroup.id.11297	11	0.140868	0.907(0.796,1.033)
PE	genus.Eggerthella.id.819	10	0.141354	0.879(0.741,1.044)
PE	genus.Desulfovibrio.id.3173	10	0.144839	1.188(0.942,1.498)
PE	genus.Parabacteroides.id.954	5	0.163099	0.753(0.505,1.122)
PE	genus.RuminococcaceaeUCG003.id.11361	12	0.165183	0.846(0.668,1.071)
PE	genus.Bifidobacterium.id.436	13	0.166882	0.821(0.620,1.086)
PE	genus.LachnospiraceaeUCG008.id.11328	11	0.173682	0.885(0.742,1.055)
PE	genus.Prevotella7.id.11182	11	0.177021	0.911(0.796,1.043)
PE	genus.LachnospiraceaeUCG001.id.11321	13	0.189049	1.158(0.930,1.441)
PE	genus.ErysipelotrichaceaeUCG003.id.11384	16	0.190644	1.150(0.933,1.417)
PE	genus.Olsenella.id.822	10	0.195306	1.106(0.949,1.290)
PE	genus.Gordonibacter.id.821	12	0.197394	1.090(0.956,1.243)
PE	genus.Roseburia.id.2012	14	0.212451	1.179(0.910,1.529)
PE	genus.Veillonella.id.2198	6	0.215819	0.832(0.622,1.113)
PE	genus.Streptococcus.id.1853	14	0.218616	1.170(0.911,1.502)
PE	genus.Anaerotruncus.id.2054	13	0.22081	0.851(0.657,1.102)
PE	genus.Collinsella.id.815	9	0.223206	0.777(0.518,1.166)
PE	genus.RuminococcaceaeUCG004.id.11362	11	0.234642	0.858(0.666,1.105)
PE	genus.Adlercreutzia.id.812	8	0.241195	0.843(0.633,1.122)
PE	genus.LachnospiraceaeND3007group.id.11317	3	0.248955	1.513(0.748,3.058)
PE	genus.RuminococcaceaeUCG009.id.11366	12	0.253756	1.127(0.918,1.383)
PE	genus.Akkermansia.id.4037	11	0.278935	1.137(0.901,1.433)
PE	genus.Eubacteriumfissicatenagroup.id.14373	9	0.288122	1.090(0.930,1.278)
PE	genus.Eubacteriumeligensgroup.id.14372	6	0.292129	0.826(0.578,1.179)
PE	genus.Oxalobacter.id.2978	11	0.293318	1.089(0.929,1.275)
PE	genus.Odoribacter.id.952	7	0.301346	1.232(0.829,1.832)
PE	genus.Ruminococcusgnavusgroup.id.14376	12	0.317168	1.089(0.922,1.286)
PE	genus.Intestinimonas.id.2062	14	0.317996	0.900(0.732,1.107)
PE	genus.RuminococcaceaeUCG005.id.11363	14	0.326499	1.128(0.887,1.435)
PE	genus.Turicibacter.id.2162	10	0.329241	1.111(0.899,1.372)
PE	genus.Prevotella9.id.11183	15	0.331789	1.116(0.894,1.395)
PE	genus.Holdemania.id.2157	14	0.333874	0.903(0.733,1.111)
PE	genus.Anaerofilum.id.2053	11	0.336821	0.925(0.788,1.085)
PE	genus.RuminococcaceaeUCG011.id.11368	8	0.35353	1.073(0.924,1.247)
PE	genus.RuminococcaceaeNK4A214group.id.11358	13	0.374303	0.866(0.631,1.189)
PE	genus.Actinomyces.id.423	7	0.383912	1.137(0.852,1.517)
PE	genus.Parasutterella.id.2892	14	0.385737	0.906(0.725,1.132)
PE	genus.Butyricicoccus.id.2055	8	0.385859	1.139(0.849,1.529)
PE	genus.Alloprevotella.id.961	6	0.40248	0.930(0.784,1.102)
PE	genus.Coprobacter.id.949	10	0.420197	0.915(0.737,1.136)
PE	genus.Coprococcus1.id.11301	12	0.429453	0.886(0.657,1.196)
PE	genus.Holdemanella.id.11393	11	0.466481	1.073(0.888,1.297)
PE	genus.Subdoligranulum.id.2070	11	0.469846	1.104(0.844,1.444)
PE	genus.Dorea.id.1997	10	0.487908	0.869(0.583,1.293)
PE	genus.Lactobacillus.id.1837	9	0.502496	1.063(0.889,1.271)
PE	genus.LachnospiraceaeFCS020group.id.11314	12	0.502836	1.083(0.857,1.369)
PE	genus.Catenibacterium.id.2153	4	0.504873	1.076(0.868,1.333)
PE	genus.Oscillibacter.id.2063	13	0.508085	0.939(0.780,1.131)
PE	genus.Eisenbergiella.id.11304	11	0.512919	0.946(0.802,1.116)
PE	genus.Eubacteriumcoprostanoligenesgroup.id.11375	13	0.515721	1.096(0.832,1.443)
PE	genus.LachnospiraceaeNC2004group.id.11316	9	0.521548	0.939(0.775,1.138)
PE	genus.Sutterella.id.2896	12	0.52933	1.080(0.850,1.372)
PE	genus.RuminococcaceaeUCG013.id.11370	12	0.534783	0.922(0.713,1.192)
PE	genus.Sellimonas.id.14369	9	0.535517	0.959(0.841,1.094)
PE	genus.Howardella.id.2000	9	0.573413	0.961(0.835,1.105)
PE	genus.Ruminococcustorquesgroup.id.14377	9	0.578293	1.142(0.716,1.821)
PE	genus.Ruminiclostridium5.id.11355	11	0.595244	1.103(0.768,1.586)
PE	genus.Butyricimonas.id.945	13	0.597261	1.062(0.849,1.329)
PE	genus.Phascolarctobacterium.id.2168	9	0.598569	1.072(0.828,1.386)
PE	genus.Blautia.id.1992	13	0.599862	1.076(0.817,1.417)
PE	genus.Hungatella.id.11306	5	0.621681	0.947(0.765,1.174)
PE	genus.CandidatusSoleaferrea.id.11350	10	0.624153	0.956(0.797,1.146)
PE	genus.Clostridiumsensustricto1.id.1873	7	0.625566	1.077(0.800,1.451)
PE	genus.RikenellaceaeRC9gutgroup.id.11191	11	0.631043	0.969(0.850,1.103)
PE	genus.Barnesiella.id.944	13	0.632291	0.943(0.741,1.200)
PE	genus.Peptococcus.id.2037	12	0.633013	1.037(0.892,1.207)
PE	genus.Flavonifractor.id.2059	5	0.653164	1.079(0.775,1.502)
PE	genus.Clostridiuminnocuumgroup.id.14397	9	0.665856	1.034(0.888,1.203)
PE	genus.Faecalibacterium.id.2057	10	0.667122	0.950(0.750,1.202)
PE	genus.RuminococcaceaeUCG010.id.11367	6	0.678286	0.937(0.687,1.277)
PE	genus.Allisonella.id.2174	8	0.678601	0.970(0.842,1.119)
PE	genus.Ruminococcus2.id.11374	15	0.686191	0.957(0.773,1.184)
PE	genus.Dialister.id.2183	11	0.715254	0.949(0.714,1.260)
PE	genus.Slackia.id.825	6	0.720789	1.045(0.819,1.334)
PE	genus.Fusicatenibacter.id.11305	18	0.730562	0.961(0.764,1.208)
PE	genus.Coprococcus3.id.11303	9	0.746255	1.064(0.730,1.552)
PE	genus.Oscillospira.id.2064	8	0.754352	0.960(0.745,1.238)
PE	genus.RuminococcaceaeUCG014.id.11371	11	0.756952	1.038(0.821,1.312)
PE	genus.Terrisporobacter.id.11348	5	0.761123	0.958(0.725,1.265)
PE	genus.DefluviitaleaceaeUCG011.id.11287	9	0.762997	1.036(0.823,1.304)
PE	genus.Coprococcus2.id.11302	8	0.763939	0.957(0.716,1.278)
PE	genus.Escherichia.Shigella.id.3504	10	0.773773	0.961(0.735,1.257)
PE	genus.Ruminiclostridium9.id.11357	8	0.775355	0.952(0.678,1.336)
PE	genus.LachnospiraceaeUCG010.id.11330	10	0.785264	1.039(0.791,1.364)
PE	genus.lntestinimonas.id.2062	3	0.787459	0.941(0.606,1.462)
PE	genus.Eubacteriumbrachygroup.id.11296	10	0.80764	0.982(0.846,1.140)
PE	genus.Lachnoclostridium.id.11308	13	0.817047	0.965(0.717,1.301)
PE	genus.Ruminococcusgauvreauiigroup.id.11342	12	0.829057	0.974(0.769,1.235)
PE	genus.Paraprevotella.id.962	13	0.857634	1.015(0.866,1.189)
PE	genus.Haemophilus.id.3698	9	0.86885	0.981(0.783,1.230)
PE	genus.Romboutsia.id.11347	13	0.87361	0.978(0.743,1.288)
PE	genus.Alistipes.id.968	13	0.87683	1.033(0.685,1.558)
PE	genus.lntestinibacter.id.11345	3	0.882187	1.037(0.640,1.682)
PE	genus.Lachnospira.id.2004	6	0.887327	0.970(0.635,1.481)
PE	genus.Ruminiclostridium6.id.11356	15	0.888564	0.984(0.788,1.229)
PE	genus.Eubacteriumhalliigroup.id.11338	16	0.899371	1.013(0.827,1.241)
PE	genus.Bilophila.id.3170	13	0.916032	0.987(0.776,1.256)
PE	genus.LachnospiraceaeUCG004.id.11324	12	0.922546	1.013(0.780,1.316)
PE	genus.ChristensenellaceaeR.7group.id.11283	10	0.93819	0.988(0.730,1.337)
PE	genus.Eubacteriumoxidoreducensgroup.id.11339	5	0.944442	1.009(0.794,1.281)
PE	genus.Erysipelatoclostridium.id.11381	15	0.944738	0.994(0.827,1.193)
PE	genus.Bacteroides.id.918	9	0.964908	0.993(0.720,1.368)
PE	genus.Anaerostipes.id.1991	13	0.972704	0.994(0.700,1.412)
PE	genus.Marvinbryantia.id.2005	10	0.9739	0.995(0.732,1.351)
PE	genus.Lactococcus.id.1851	9	0.979336	0.998(0.827,1.204)
PE	genus.Eubacteriumxylanophilumgroup.id.14375	9	0.995728	1.001(0.755,1.327)
