# Supplementary material for: Gut microbiota and hypertensive disorders in pregnancy: evidence from the Mendelian randomization study
Source: Aging (Albany NY). 2023 Sep 11;15(17):9105–27. doi: 10.18632/aging.205019 (PMC10522390; doi:10.18632/aging.205019)
Supplement: Supplementary Table 5 [file aging-15-205019-s006.xlsx]

## Sheet: Table S5
Supplementary Table 5. Odds ratio for association of genetically predicted gut microbiota with eclampsia using the method of Inverse variance weighted (IVW).
Outcome	Exposure	Numbers of SNP	P value	OR(95%CI)
Eclampsia	genus.RuminococcaceaeUCG010.id.11367	6	0.00301374	0.204(0.071,0.583)
Eclampsia	genus.Dorea.id.1997	10	0.0137598	0.268(0.094,0.764)
Eclampsia	genus.Eubacteriumeligensgroup.id.14372	6	0.0593399	0.308(0.091,1.047)
Eclampsia	genus.Desulfovibrio.id.3173	10	0.0788792	0.504(0.234,1.082)
Eclampsia	genus.LachnospiraceaeNK4A136group.id.11319	15	0.0941156	1.822(0.903,3.678)
Eclampsia	genus.Sellimonas.id.14369	9	0.0969972	0.658(0.402,1.079)
Eclampsia	genus.Ruminococcus1.id.11373	10	0.0978918	0.468(0.191,1.150)
Eclampsia	genus.Lachnoclostridium.id.11308	13	0.111899	0.486(0.200,1.183)
Eclampsia	genus.Clostridiumsensustricto1.id.1873	7	0.11617	0.374(0.110,1.275)
Eclampsia	genus.RuminococcaceaeUCG002.id.11360	22	0.120835	0.611(0.327,1.139)
Eclampsia	genus.Allisonella.id.2174	8	0.127431	1.662(0.865,3.196)
Eclampsia	genus.Prevotella7.id.11182	11	0.139286	1.414(0.893,2.238)
Eclampsia	genus.Alistipes.id.968	13	0.146271	0.483(0.181,1.289)
Eclampsia	genus.Oscillibacter.id.2063	13	0.151443	0.631(0.337,1.184)
Eclampsia	genus.RikenellaceaeRC9gutgroup.id.11191	11	0.15366	0.686(0.409,1.151)
Eclampsia	genus.LachnospiraceaeUCG008.id.11328	11	0.156405	0.650(0.358,1.180)
Eclampsia	genus.Olsenella.id.822	10	0.157282	1.396(0.879,2.217)
Eclampsia	genus.Enterorhabdus.id.820	6	0.161973	0.528(0.216,1.292)
Eclampsia	genus.Eubacteriumbrachygroup.id.11296	10	0.168125	0.701(0.422,1.162)
Eclampsia	genus.Ruminococcustorquesgroup.id.14377	9	0.203787	2.178(0.656,7.236)
Eclampsia	genus.Roseburia.id.2012	14	0.211279	0.534(0.199,1.429)
Eclampsia	genus.Slackia.id.825	6	0.225613	1.667(0.729,3.809)
Eclampsia	genus.Eubacteriumruminantiumgroup.id.11340	18	0.237433	0.746(0.458,1.213)
Eclampsia	genus.Butyricicoccus.id.2055	8	0.244634	1.815(0.665,4.952)
Eclampsia	genus.Prevotella9.id.11183	15	0.246071	1.418(0.786,2.560)
Eclampsia	genus.Turicibacter.id.2162	10	0.248263	1.526(0.745,3.125)
Eclampsia	genus.Bifidobacterium.id.436	13	0.255472	0.666(0.331,1.342)
Eclampsia	genus.Ruminococcus2.id.11374	15	0.273383	0.609(0.251,1.478)
Eclampsia	genus.Lachnospira.id.2004	6	0.290976	0.398(0.072,2.201)
Eclampsia	genus.Oxalobacter.id.2978	11	0.292117	0.769(0.472,1.254)
Eclampsia	genus.Blautia.id.1992	13	0.305046	0.530(0.157,1.784)
Eclampsia	genus.Coprococcus1.id.11301	12	0.324451	0.655(0.282,1.521)
Eclampsia	genus.Ruminococcusgauvreauiigroup.id.11342	12	0.328484	0.666(0.295,1.505)
Eclampsia	genus.Oscillospira.id.2064	8	0.338124	1.523(0.644,3.601)
Eclampsia	genus.Butyrivibrio.id.1993	15	0.344807	1.194(0.827,1.723)
Eclampsia	genus.DefluviitaleaceaeUCG011.id.11287	9	0.353331	1.448(0.663,3.161)
Eclampsia	genus.Methanobrevibacter.id.123	6	0.356377	0.734(0.381,1.416)
Eclampsia	genus.Fusicatenibacter.id.11305	18	0.367768	0.678(0.291,1.579)
Eclampsia	genus.CandidatusSoleaferrea.id.11350	10	0.370552	0.698(0.318,1.532)
Eclampsia	genus.Holdemanella.id.11393	11	0.370686	0.755(0.409,1.396)
Eclampsia	genus.Tyzzerella3.id.11335	13	0.42645	1.330(0.658,2.688)
Eclampsia	genus.Gordonibacter.id.821	12	0.428139	1.257(0.714,2.211)
Eclampsia	genus.Anaerostipes.id.1991	13	0.432753	0.693(0.277,1.732)
Eclampsia	genus.Phascolarctobacterium.id.2168	9	0.444635	1.405(0.588,3.359)
Eclampsia	genus.Streptococcus.id.1853	14	0.457646	1.435(0.553,3.720)
Eclampsia	genus.Lactococcus.id.1851	9	0.459759	1.242(0.699,2.209)
Eclampsia	genus.Actinomyces.id.423	7	0.460465	0.751(0.352,1.606)
Eclampsia	genus.Dialister.id.2183	11	0.465001	1.380(0.582,3.273)
Eclampsia	genus.LachnospiraceaeND3007group.id.11317	3	0.495986	0.526(0.083,3.339)
Eclampsia	genus.Eggerthella.id.819	10	0.496747	0.813(0.448,1.477)
Eclampsia	genus.Marvinbryantia.id.2005	10	0.503265	0.724(0.281,1.866)
Eclampsia	genus.Coprobacter.id.949	10	0.510366	0.801(0.415,1.549)
Eclampsia	genus.Sutterella.id.2896	12	0.512184	1.312(0.582,2.957)
Eclampsia	genus.ErysipelotrichaceaeUCG003.id.11384	16	0.513117	1.315(0.578,2.992)
Eclampsia	genus.Bilophila.id.3170	13	0.539158	1.296(0.566,2.968)
Eclampsia	genus.RuminococcaceaeUCG004.id.11362	11	0.553507	0.804(0.390,1.655)
Eclampsia	genus.Peptococcus.id.2037	12	0.560962	1.217(0.627,2.361)
Eclampsia	genus.Odoribacter.id.952	7	0.565379	0.725(0.243,2.169)
Eclampsia	genus.ChristensenellaceaeR.7group.id.11283	10	0.569215	0.687(0.189,2.501)
Eclampsia	genus.Holdemania.id.2157	14	0.576102	0.836(0.446,1.567)
Eclampsia	genus.Victivallis.id.2256	10	0.577291	1.152(0.700,1.895)
Eclampsia	genus.Eubacteriumoxidoreducensgroup.id.11339	5	0.587513	0.799(0.355,1.798)
Eclampsia	genus.Hungatella.id.11306	5	0.592595	0.756(0.271,2.109)
Eclampsia	genus.Lactobacillus.id.1837	9	0.609095	0.854(0.465,1.566)
Eclampsia	genus.LachnospiraceaeFCS020group.id.11314	12	0.616267	1.226(0.553,2.717)
Eclampsia	genus.Adlercreutzia.id.812	8	0.622441	0.769(0.270,2.191)
Eclampsia	genus.Akkermansia.id.4037	11	0.628521	1.214(0.553,2.664)
Eclampsia	genus.Terrisporobacter.id.11348	5	0.640823	1.385(0.352,5.447)
Eclampsia	genus.Eubacteriumnodatumgroup.id.11297	11	0.645556	0.870(0.482,1.572)
Eclampsia	genus.Eubacteriumventriosumgroup.id.11341	15	0.656495	0.838(0.384,1.829)
Eclampsia	genus.Intestinibacter.id.11345	15	0.657207	1.169(0.587,2.325)
Eclampsia	genus.Faecalibacterium.id.2057	10	0.660643	1.239(0.476,3.229)
Eclampsia	genus.Eubacteriumrectalegroup.id.14374	8	0.669238	0.760(0.216,2.678)
Eclampsia	genus.RuminococcaceaeUCG013.id.11370	12	0.676508	1.298(0.382,4.412)
Eclampsia	genus.Subdoligranulum.id.2070	11	0.678146	1.279(0.400,4.094)
Eclampsia	genus.Eubacteriumfissicatenagroup.id.14373	9	0.682697	1.119(0.652,1.923)
Eclampsia	genus.Veillonella.id.2198	6	0.690367	1.222(0.456,3.273)
Eclampsia	genus.Parabacteroides.id.954	5	0.705362	0.675(0.088,5.189)
Eclampsia	genus.Eubacteriumhalliigroup.id.11338	16	0.715402	0.880(0.443,1.749)
Eclampsia	genus.Coprococcus3.id.11303	9	0.720795	1.334(0.275,6.480)
Eclampsia	genus.LachnospiraceaeUCG004.id.11324	12	0.722655	0.840(0.320,2.204)
Eclampsia	genus.Intestinimonas.id.2062	14	0.725164	1.134(0.562,2.292)
Eclampsia	genus.lntestinibacter.id.11345	3	0.76705	0.802(0.186,3.460)
Eclampsia	genus.Collinsella.id.815	9	0.777397	1.166(0.402,3.377)
Eclampsia	genus.Eubacteriumxylanophilumgroup.id.14375	9	0.778092	1.158(0.417,3.215)
Eclampsia	genus.RuminococcaceaeUCG009.id.11366	12	0.78575	0.920(0.503,1.681)
Eclampsia	genus.LachnospiraceaeUCG010.id.11330	10	0.786785	1.136(0.450,2.871)
Eclampsia	genus.Eisenbergiella.id.11304	11	0.796742	0.918(0.478,1.761)
Eclampsia	genus.Catenibacterium.id.2153	4	0.798645	0.872(0.303,2.507)
Eclampsia	genus.RuminococcaceaeUCG003.id.11361	12	0.805939	0.891(0.356,2.233)
Eclampsia	genus.Haemophilus.id.3698	9	0.809069	0.905(0.404,2.030)
Eclampsia	genus.LachnospiraceaeUCG001.id.11321	13	0.809214	1.084(0.564,2.081)
Eclampsia	genus.RuminococcaceaeNK4A214group.id.11358	13	0.809256	1.107(0.485,2.526)
Eclampsia	genus.Ruminococcusgnavusgroup.id.14376	12	0.809518	0.917(0.453,1.855)
Eclampsia	genus.Barnesiella.id.944	13	0.810191	1.119(0.447,2.805)
Eclampsia	genus.Alloprevotella.id.961	6	0.813772	1.077(0.581,1.995)
Eclampsia	genus.RuminococcaceaeUCG014.id.11371	11	0.821425	0.912(0.412,2.022)
Eclampsia	genus.Anaerofilum.id.2053	11	0.825675	0.926(0.468,1.834)
Eclampsia	genus.Erysipelatoclostridium.id.11381	15	0.836224	1.076(0.535,2.164)
Eclampsia	genus.Coprococcus2.id.11302	8	0.837726	1.105(0.424,2.881)
Eclampsia	genus.Eubacteriumcoprostanoligenesgroup.id.11375	13	0.844222	0.890(0.277,2.855)
Eclampsia	genus.Clostridiuminnocuumgroup.id.14397	9	0.849226	0.951(0.569,1.591)
Eclampsia	genus.Ruminiclostridium6.id.11356	15	0.865787	0.937(0.441,1.990)
Eclampsia	genus.Howardella.id.2000	9	0.86824	1.059(0.541,2.073)
Eclampsia	genus.RuminococcaceaeUCG011.id.11368	8	0.868973	0.954(0.542,1.678)
Eclampsia	genus.Ruminiclostridium9.id.11357	8	0.871417	0.896(0.236,3.398)
Eclampsia	genus.Bacteroides.id.918	9	0.885258	1.081(0.377,3.093)
Eclampsia	genus.Parasutterella.id.2892	14	0.887416	1.061(0.468,2.403)
Eclampsia	genus.Butyricimonas.id.945	13	0.894653	1.064(0.427,2.651)
Eclampsia	genus.lntestinimonas.id.2062	3	0.894885	1.106(0.248,4.930)
Eclampsia	genus.Paraprevotella.id.962	13	0.896847	1.045(0.541,2.017)
Eclampsia	genus.RuminococcaceaeUCG005.id.11363	14	0.897154	0.936(0.342,2.561)
Eclampsia	genus.Anaerotruncus.id.2054	13	0.908807	1.054(0.426,2.611)
Eclampsia	genus.Romboutsia.id.11347	13	0.913241	1.045(0.472,2.317)
Eclampsia	genus.Flavonifractor.id.2059	5	0.947601	0.944(0.169,5.264)
Eclampsia	genus.Ruminiclostridium5.id.11355	11	0.965894	1.021(0.386,2.700)
Eclampsia	genus.Senegalimassilia.id.11160	5	0.983911	1.010(0.372,2.742)
Eclampsia	genus.Escherichia.Shigella.id.3504	10	0.984602	0.990(0.346,2.829)
Eclampsia	genus.LachnospiraceaeNC2004group.id.11316	9	0.995371	1.002(0.522,1.923)
